# Supplementary material for: Proteomics and Interspecies Interaction Analysis Revealed Abscisic Acid Signalling to Be the Primary Driver for Oil Palm’s Response against Red Palm Weevil Infestation
Source: MDPI journal article supplement (doi:10.3390/plants10122574), 2021-11-25
Supplement: s1 [file s1]

**Table S1.** Differentially-expressed proteins among the control, wounded and infested oil palm (OP) groups with Log<sub>2</sub> ratio of > 1.5 or < -1.5 on the first week post red palm weevil (RPW) infestation.

**Table S2.** Differentially-expressed proteins among the control, wounded and infested oil palm (OP) groups with Log<sub>2</sub> ratio of > 1.5 or < -1.5 on the third week post red palm weevil (RPW) infestation.

**Table S3.** Differentially-expressed proteins among the control, wounded and infested oil palm (OP) groups with Log<sub>2</sub> ratio of > 1.5 or < -1.5 on the sixth week post red palm weevil (RPW) infestation.
